# Supplementary material for: Metallic FeCo clusters propelling the stepwise polysulfide conversion in lithium–sulfur batteries
Source: Royal Society of Chemistry journal article supplement (doi:10.1039/d2ta05273c), 2022-01-01
Supplement: d2ta05273c1.pdf [file d2ta05273c1.pdf]

# **Metallic FeCo Clusters Propelling the Stepwise Polysulfide Conversion in Lithium–Sulfur Batteries**

Minhui Li<sup>a</sup>, Hui Wang<sup>a,\*</sup>, Xuyun Wang<sup>a</sup>, Jianwei Ren<sup>b,\*</sup>, Rongfang Wang<sup>a,\*</sup>

<sup>a</sup> State Key Laboratory Base for Eco-Chemical Engineering, College of Chemical Engineering, Qingdao University of Science and Technology, Qingdao, 266042, China

<sup>b</sup> Department of Mechanical Engineering Science, University of Johannesburg, Cnr Kingsway and University Roads, Auckland Park, 2092, Johannesburg, South Africa.

## **Experimental**

### **1.1. Preparation of the Li<sub>2</sub>S<sub>6</sub> solution**

Mixed powders of Li<sub>2</sub>S and sublimed sulphur at a molar ratio of 1:5 were dissolved into the solution containing Dioxolane (DOL)/ Dimethoxyethane (DME) (1:1, V/V). The mixture was stirring at 60 °C for 24 h to obtain the 0.2 M Li<sub>2</sub>S<sub>6</sub> solution. Similarly, the 5 mM Li<sub>2</sub>S<sub>6</sub> solution was prepared by following the same procedure.

### **1.2. Adsorption experiments**

10 mg of Fe/PNC, FeCo/PNC and Co/PNC samples were put into the 5 mL of Li<sub>2</sub>S<sub>6</sub> solution, and the individual system was kept for same period of time to visualize the color changes.

### **1.3. Physical Characterizations and Methods.**

XRD patterns were recorded at 10° min<sup>-1</sup> on a Shimadzu XD-3A using filtered Cu- K $\alpha$  radiation ( $\lambda$ =0.15418 nm) generated at 40 kV and 30 mA. Scanning electron

microscopy (SEM) images were obtained using a Carl Zeiss Ultra Plus electron microscope. High-angle annular dark field scanning transmission electron microscopy (STEM) images of the prepared samples were obtained using a JEOL (JEM-2000 FX) microscope operating at 200 kV. X-ray photoelectron spectroscopy (XPS) tests were analyzed on a PHI-5702 spectrometer, and C 1 s peak at 285.0 eV was used as a reference to calibrate the binding energies.

#### **1.4. Preparation of PNC+Li<sub>2</sub>S<sub>6</sub>, nano Fe/PNC+Li<sub>2</sub>S<sub>6</sub>, Co/PNC+Li<sub>2</sub>S<sub>6</sub> and FeCo/PNC+Li<sub>2</sub>S<sub>6</sub> for XPS Analysis.**

Li<sub>2</sub>S<sub>6</sub> solution (5 mM) was prepared by adding a mixture of lithium sulfide and sulfur powders with a molar ratio of 1:5 into DOL and DME (1:1, v/v), followed by vigorous magnetic stirring for 24 h at 60 °C in an Ar-filled glovebox. For the preparation of Fe/PNC+Li<sub>2</sub>S<sub>6</sub>, FeCo/PNC+Li<sub>2</sub>S<sub>6</sub> and Co/PNC+Li<sub>2</sub>S<sub>6</sub>, the as-prepared Fe/PNC, FeCo/PNC, and Co/PNC (10 mg) was dispersed in 5mM Li<sub>2</sub>S<sub>6</sub> solution of 5 mL by stand for 30 min. The precipitate of Fe/PNC+Li<sub>2</sub>S<sub>6</sub>, FeCo/PNC+Li<sub>2</sub>S<sub>6</sub> and Co/PNC+Li<sub>2</sub>S<sub>6</sub> was collected and dried under vacuum overnight.

#### **1.5. Li-S Cell Assembly and Electrochemical Testing**

To prepare the cathode, a mixture of S@FeCo/PNC (or S@Fe/PNC or S@Co/PNC) (70 wt %), Super P carbon (20 wt %), and PVDF (10 wt %) binder was casted onto a current collector (diameter = 10 mm) with NMP and dried at 60 °C overnight in a vacuum oven to remove solvent. The routine mass loading of sulfur in the electrode is about 1 mg cm<sup>-2</sup>. Coin cells (2032 type) with stainless steel as the current collector were

assembled in an Ar-filled glovebox, using Celgard 2400 as separator and Li metal (thickness: 0.45 mm) as anode. The electrolyte contains 1.0 M LiTFSI and 0.1 M LiNO<sub>3</sub> electrolyte additive dissolved in DOL and DME (1:1, v/v). The electrolyte/sulfur (E/S) ratio is about 40  $\mu\text{L mg}^{-1}$  unless otherwise noted. During electrochemical performance testing, both the current rate setting, and specific capacity calculation were referenced to the mass of sulfur in the cathode (1 C = 1675 mA h g<sup>-1</sup>). The cells were tested on a Neware battery system with a voltage window of 1.7–2.8 V. CV measurements and EIS testing were performed on a CHI 650D electrochemical analyzer (CH Instruments). The scan rate and voltage range of the CV measurements were 0.1 mV s<sup>-1</sup> and 1.7–2.8 V, respectively. For the EIS testing, the frequency range was from 100 kHz to 10 mHz. All the electrochemical tests were performed at ambient temperature.

The Li<sup>+</sup> diffusion rates were calculated based on the classic Randles-Sevcik equation:

$$I_p = (2.686 \times 10^5) n^{1.5} A D_{Li^+}^{0.5} C_{Li^+} v^{0.5}$$

Where,  $I_p$  is the current peak;  $n$  is the number of electron transfer ( $n=2$ );  $A$  is the electrode area ( $A=1.13 \text{ cm}^2$ );  $D_{Li^+}$  is the coefficient of Li<sup>+</sup> diffusion rates;  $C_{Li^+}$  is the Li<sup>+</sup> concentration in the electrolyte ( $0.0002 \text{ mol cm}^{-3}$ );  $v$  is the scan rate.

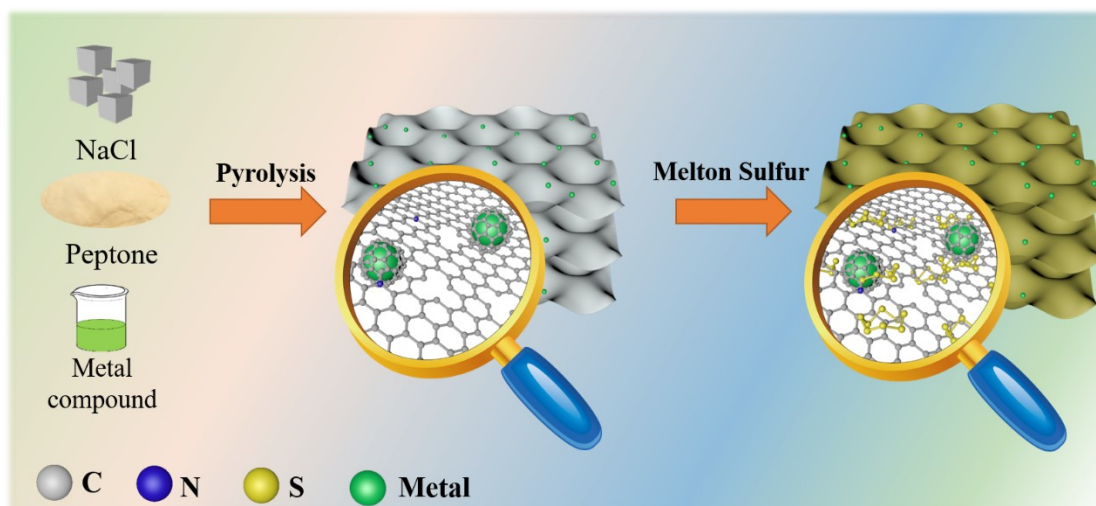

**Fig. S1.** Schematic illustration for the synthesis of S@Fe/PNC and S@Co/PNC samples.

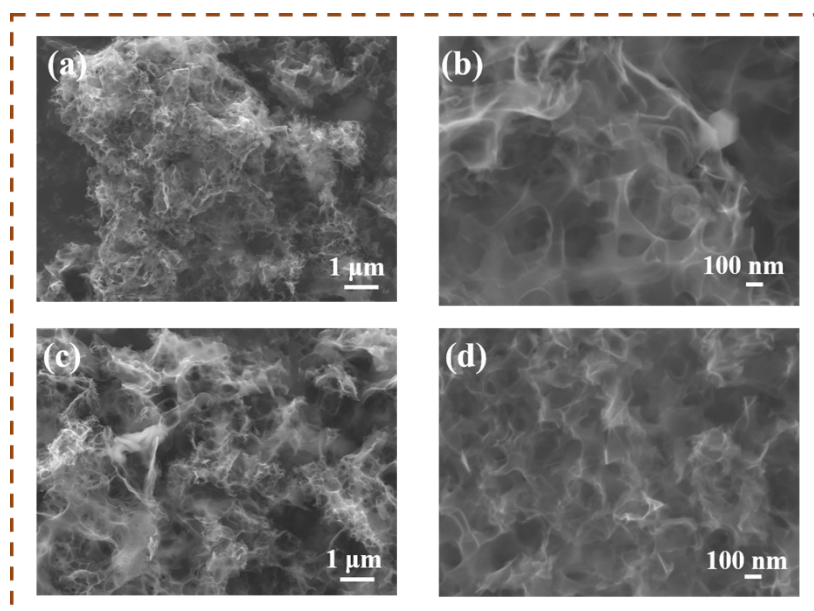

**Fig. S2.** SEM images of (a, b) Fe/PNC and (c, d) Co/PNC sample.

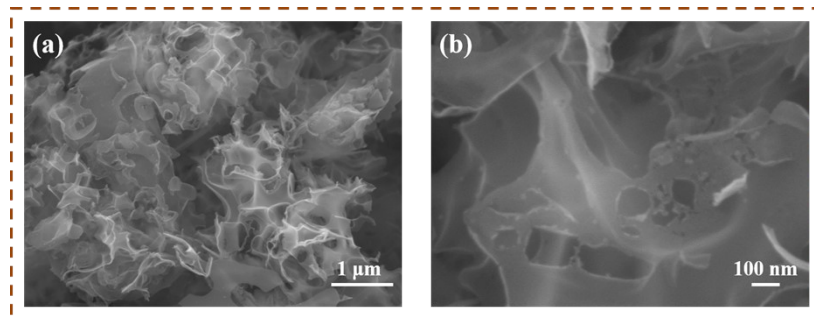

**Fig. S3.** (a, b) SEM images of the PNC sample.

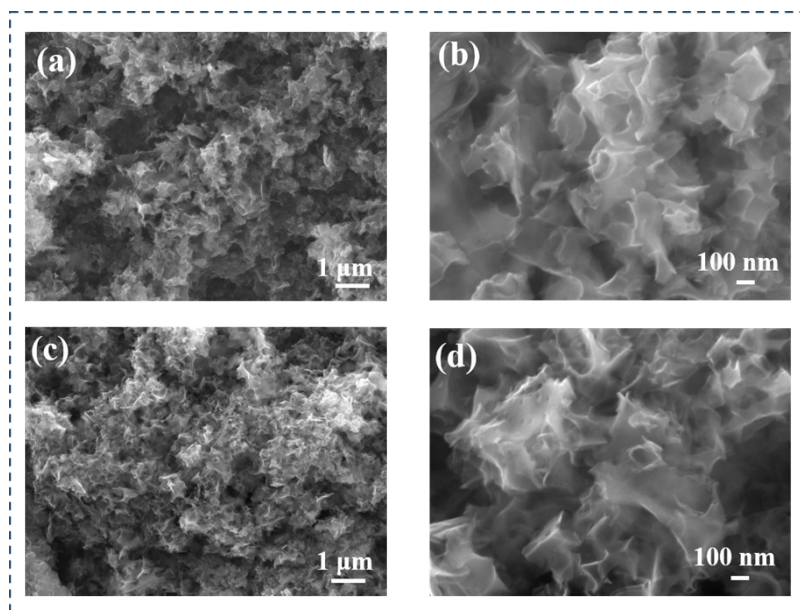

**Fig. S4.** SEM images of (a, b) S@Fe/PNC and (c, d) S@Co/PNC samples.

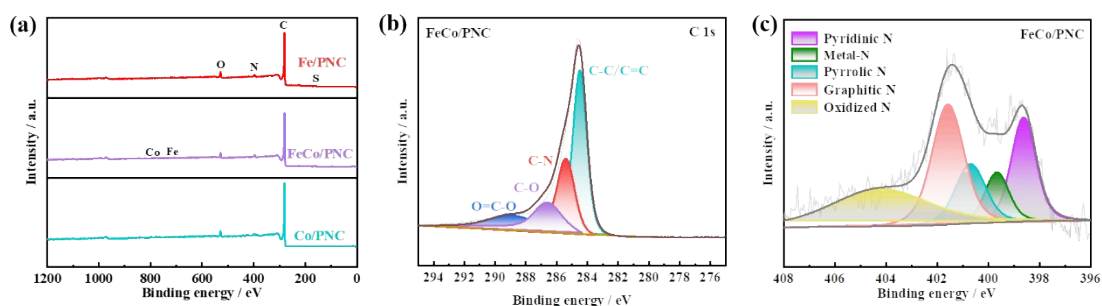

**Fig. S5.** (a) XPS survey spectra of Fe/PNC, FeCo/PNC and Co/PNC samples. The high-resolution XPS spectra for (b) C 1s, (c) N 1s of FeCo/PNC sample.

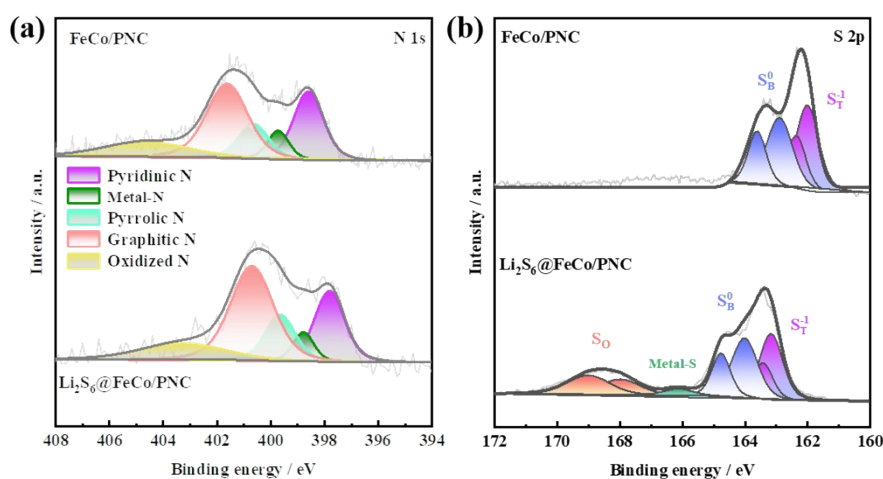

**Fig. S6.** (a, b) N 1s and S 2p of FeCo/PNC and S@FeCo/PNC composites before and after absorption.

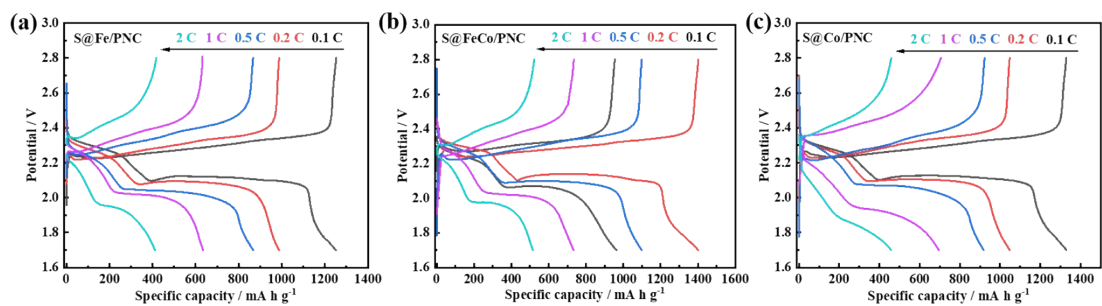

**Fig. S7.** (a-c) The discharge-charge profiles of S@Fe/PNC, S@FeCo/PNC and S@Co/PNC samples from 0.1 to 2.0 C.

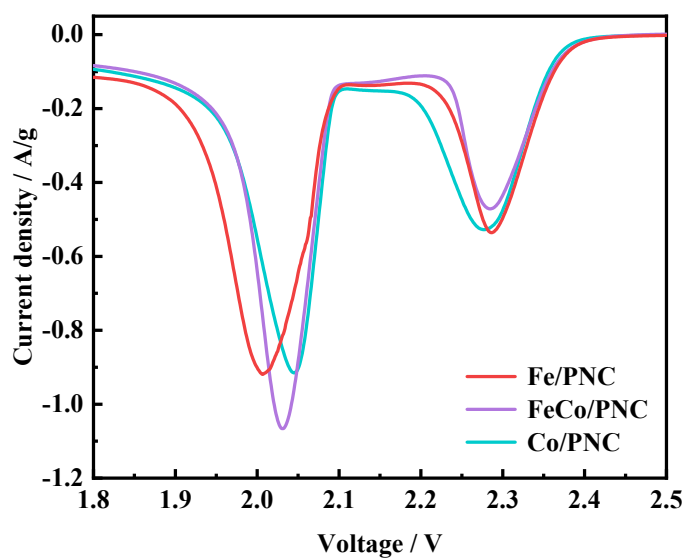

**Fig. S8.** LSV between 1.8 and 2.8 V at a scan rate of  $0.1 \text{ mV s}^{-1}$

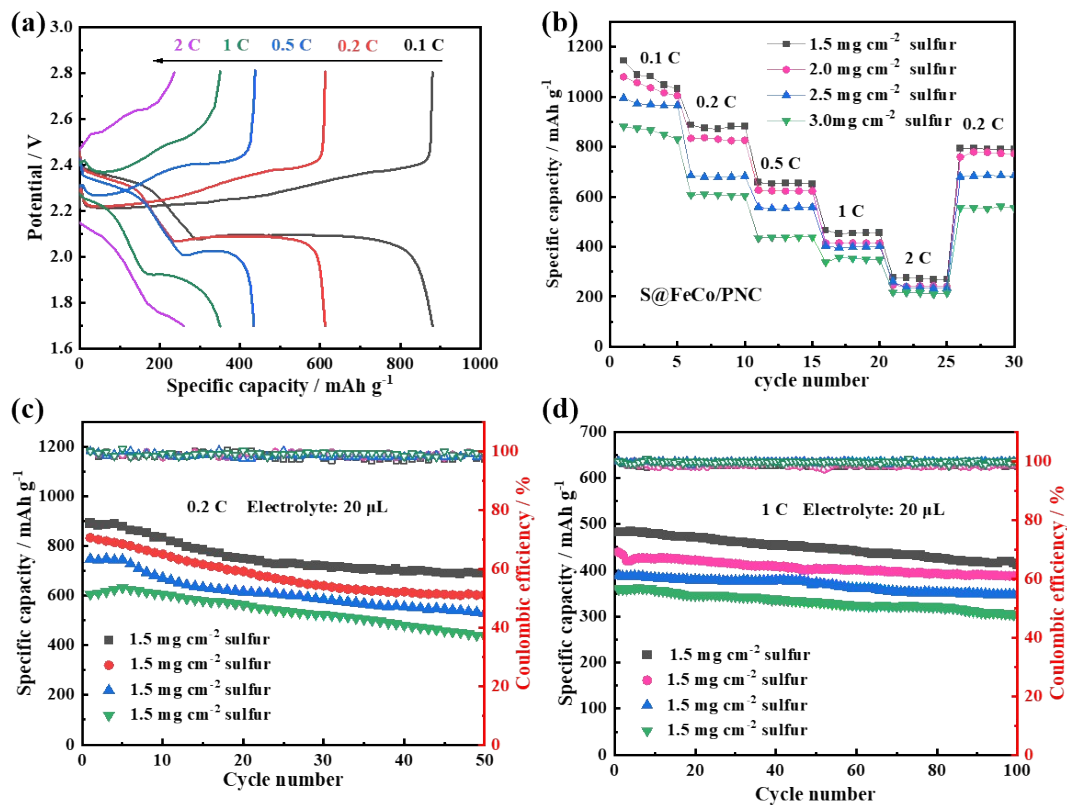

**Fig. S9.** (a) The discharge-charge profiles, (b) rate capability, the cycling performance of FeCo/PNC electrode at (c) 0.2 C and (d) 1 C with 20  $\mu$ L electrolyte.

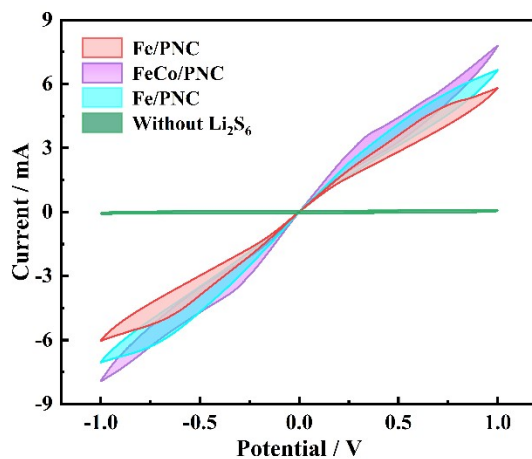

**Fig. S10.** CV curves of Li<sub>2</sub>S<sub>6</sub> symmetric cells of S@Fe/PNC, S@FeCo/PNC and S@Co/PNC samples.

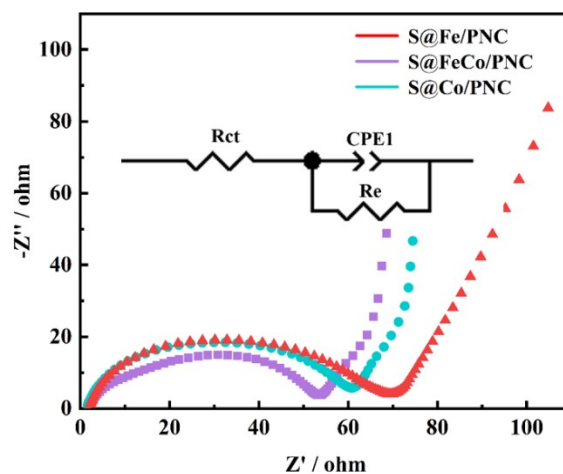

**Fig. S11** EIS Nyquist plots and corresponding equivalent circuit diagram of S@Fe/PNC, S@FeCo/PNC and S@Co/PNC samples.

**Table S1.** Physical properties of Fe/PNC, FeCo/PNC and Co/PNC samples.

| Sample    | Specific Surface Area<br>/ $\text{m}^2 \text{g}^{-1}$ | Pore Volume<br>/ $\text{cm}^3 \text{g}^{-1}$ |
|-----------|-------------------------------------------------------|----------------------------------------------|
| Fe/PNC    | 355                                                   | 0.92                                         |
| Fe Co/PNC | 437                                                   | 0.99                                         |
| Co /PNC   | 610                                                   | 1.06                                         |

**Table S2.** Elements content of three host materials (Fe/PNC, FeCo/PNC and Co/PNC).

| Sample                            | C     | N    | O    | Fe   | Co   |
|-----------------------------------|-------|------|------|------|------|
| PNC                               | 92.95 | 3.05 | 3.62 | 0.38 | /    |
| nano $\text{Fe}_3\text{O}_4$ /PNC | 93.09 | 3.02 | 3.45 | 0.21 | 0.23 |
| $\text{Fe}_3\text{O}_4$ /PNC      | 93.36 | 2.90 | 3.32 | /    | 0.42 |

**Table S3.** Li-S performance comparison of Fe/Co composite with results reported in literature.

| Sample  | Sulfur loading<br>of cathode | Initial capacity<br>( $\text{mAh g}^{-1}$ , at n C) | Decay<br>(per cycle, %) | Ref. |
|---------|------------------------------|-----------------------------------------------------|-------------------------|------|
| SC-Co   | 63%                          | 1130 (0.5 C)                                        | 0.086                   | 1    |
| Co-CNCS | 74.5%                        | 1290 (0.2 C)                                        | 0.029                   | 2    |
| Co-Fe-P | 70%                          | 1118 (0.2 C)                                        | 0.043                   | 3    |
| Co/PNC  | 60%                          | 1105 (0.2 C)                                        | 0.064                   | 4    |

|                           |       |              |       |                  |
|---------------------------|-------|--------------|-------|------------------|
| <b>FeCo-C</b>             | 70%   | 1250 (0.2 C) | 0.073 | <sup>5</sup>     |
| <b>NC-CoS<sub>2</sub></b> | 68.7% | 1150 (0.1 C) | /     | <sup>6</sup>     |
| <b>Fe-PNC</b>             | 70%   | 1138 (0.1 C) | /     | <sup>7</sup>     |
| <b>FeCo/PNC</b>           | 71.1% | 1405 (0.1C)  | 0.045 | <b>This work</b> |

---

## References

1. J. Xie, B.-Q. Li, H.-J. Peng, Y.-W. Song, M. Zhao, X. Chen, Q. Zhang and J.-Q. Huang, *Adv. Mater.*, 2019, **31**, 1903813.
2. Q. Wu, X. Zhou, J. Xu, F. Cao and C. Li, *ACS Nano*, 2019, **13**, 9520-9532.
3. Y. Chen, W. Zhang, D. Zhou, H. Tian, D. Su, C. Wang, D. Stockdale, F. Kang, B. Li and G. Wang, *ACS Nano*, 2019, **13**, 4731-4741.
4. F. L. Zhang, S. Ji, H. Wang, H. G. Liang, X. Y. Wang and R. F. Wang, *Small Methods*, 2021, **5**, 2100066.
5. H. Li, L. Fei, R. Zhang, S. Yu, Y. Zhang, L. Shu, Y. Li and Y. Wang, *Journal of Energy Chemistry*, 2020, **49**, 339-347.
6. Z. Zhang, B. Zhao, F. Ma, Y. Jin, H. Gao and W. Kim, *Electrochimica Acta*, 2019, **324**, 134899.
7. Z. Liu, L. Zhou, Q. Ge, R. Chen, M. Ni, W. Utetiwabo, X. Zhang and W. Yang, *ACS Appl. Mater. Interfaces*, 2018, **10**, 19311-19317.
